# Supplementary material for: Controlled Release of Volatile Antimicrobial Compounds from Mesoporous Silica Nanocarriers for Active Food Packaging Applications
Source: MDPI journal article supplement (doi:10.3390/ijms23137032), 2022-06-24
Supplement: s1 [file s1]

## Supplementary data to: Controlled release of volatile antimicrobial compounds from mesoporous silica nanocarriers for active food packaging applications

Tina Gulin-Sarfraz\*, Georgios Kalantzopoulos, John-Erik Haugen, Lars Axelsson, Hilde Raanaas Kolstad, Jawad Sarfraz\*

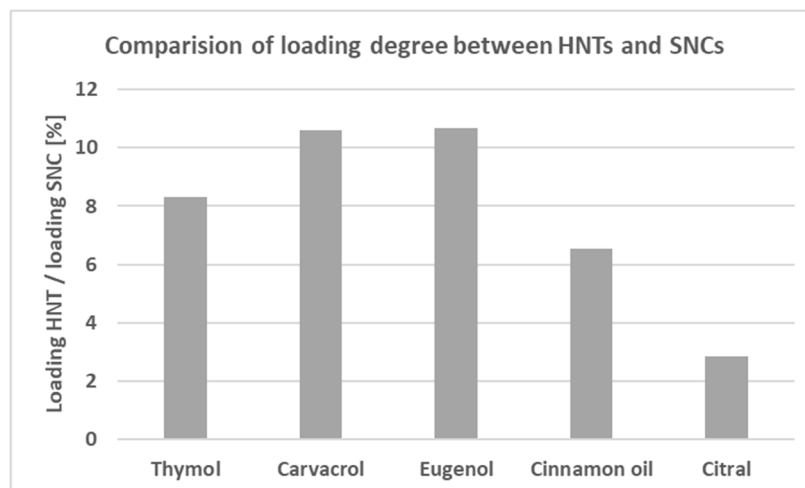

**Supplementary Figure S1.** The total amount of the encapsulated active compounds in halloysite nanotubes (HNTs) are compared with silica nanocarriers (SNCs) and are presented in percentage.

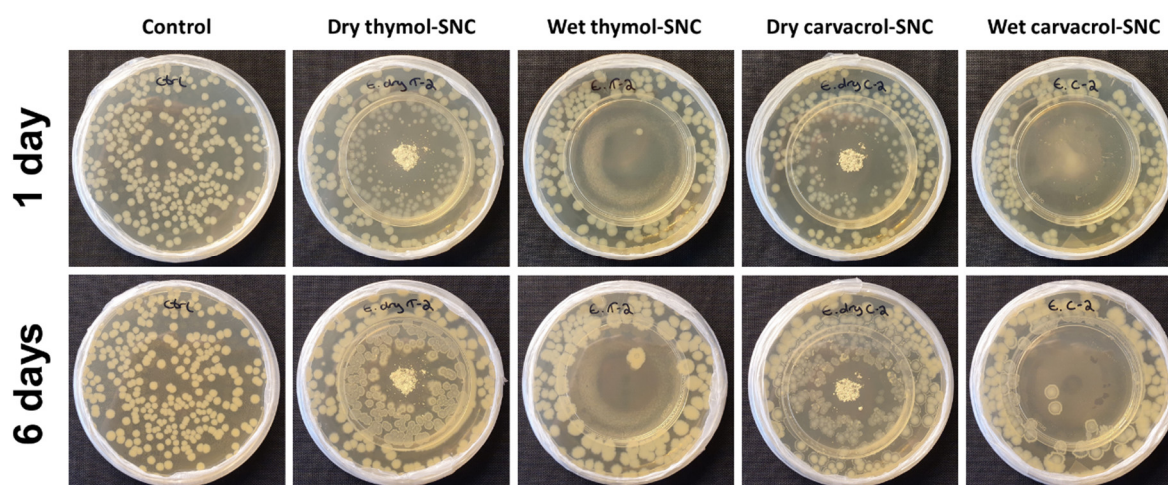

**Supplementary Figure S2.** Antimicrobial effect of silica nanocarriers (SNC) loaded with thymol or carvacrol on *Escherichia coli*. The pictures were taken after one day and six days of incubation at 37 °C. A clear effect on the growth of the bacteria can be seen for both thymol and carvacrol loaded SNCs. However, a more pronounced antimicrobial effect is revealed after activating the release from the SNCs (named “wet” in the figure). A change in the morphology of the bacteria treated with the active compounds could also be noticed.

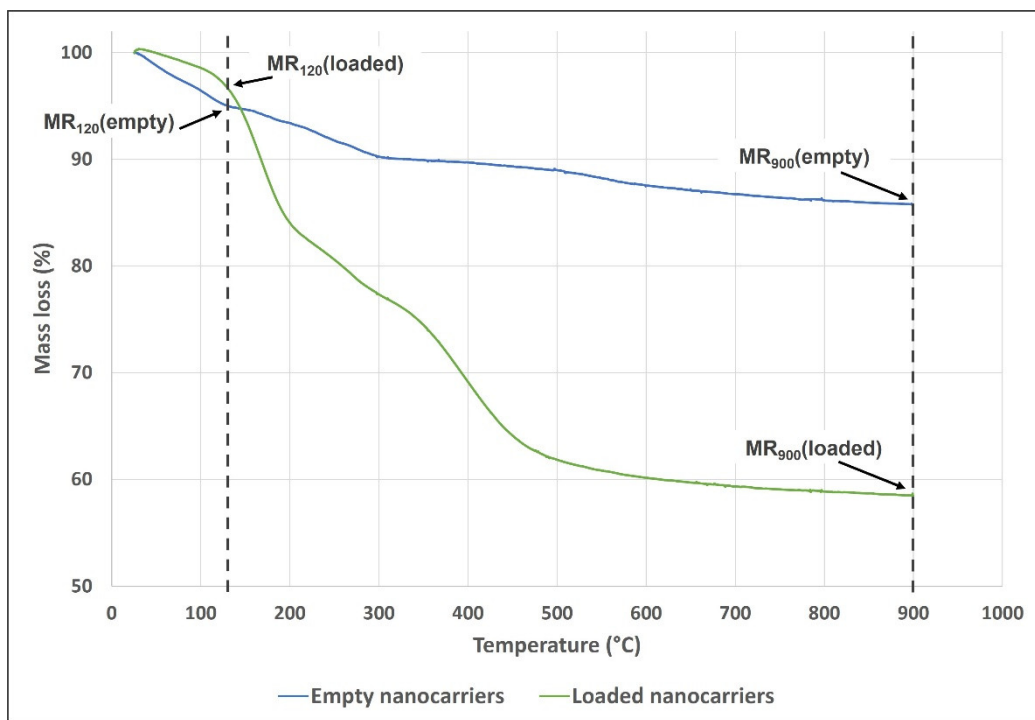

**Supplementary Figure S3.** Examples of percent mass residue (MR) values are illustrated to assist the explanation of the equations used for determining the encapsulated amount active compound by thermogravimetric analysis (TGA).
